# Supplementary material for: Synthesis of core–shell N-TiO2@CuOx with enhanced visible light photocatalytic performance
Source: Royal Society of Chemistry journal article supplement (doi:10.1039/c8ra02708k), 2018-01-01
Supplement: c8ra02708k1.pdf [file c8ra02708k1.pdf]

Electronic Supplementary Information

## Synthesis of Core-shell N-TiO<sub>2</sub>@CuO<sub>x</sub> with Enhanced Visible Light Photocatalytic Performance

Shu Wang,<sup>a</sup> Rufe Huo,<sup>a</sup> Rui Zhang,<sup>a</sup> Yuchuan Zheng,<sup>a</sup> Changjiang Li,<sup>a</sup> and Le Pan<sup>\*a</sup>

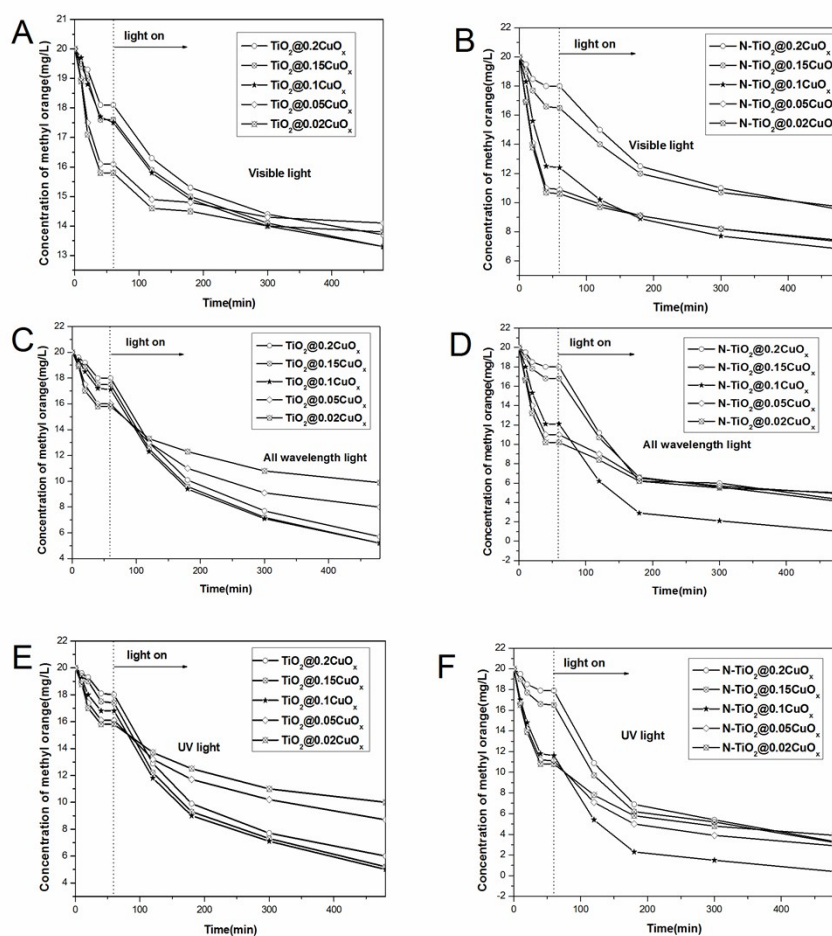

Fig. S1 Concentration of methyl orange as a function of the reaction time over the different amount of copper oxide in the catalytic system TiO<sub>2</sub>@CuO<sub>x</sub> and N-TiO<sub>2</sub>@CuO<sub>x</sub> catalysts in UV, all wavelength, and visible light respectively.

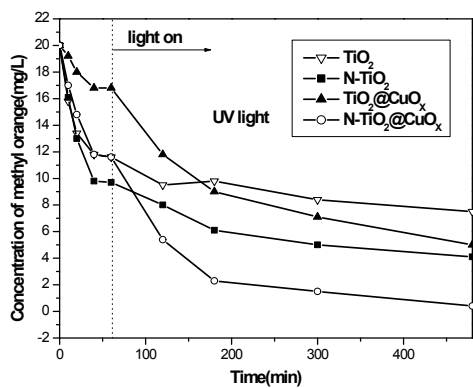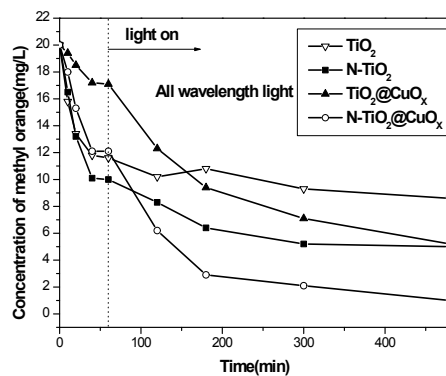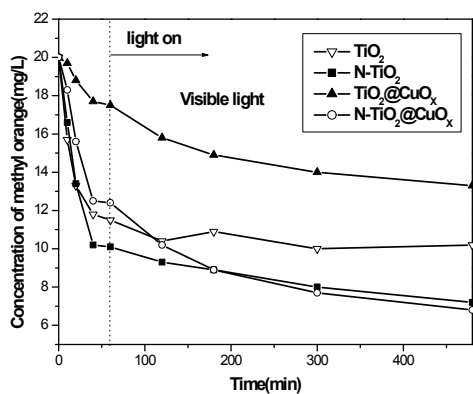

Fig. S2 Concentration of methyl orange as a function of the reaction time over the TiO<sub>2</sub>, N-TiO<sub>2</sub>, TiO<sub>2</sub>@CuO<sub>x</sub> and N-TiO<sub>2</sub>@CuO<sub>x</sub> catalysts in UV, all wavelength and visible light respectively.
